# Supplementary material for: Health gains and financial risk protection afforded by public financing of selected malaria interventions in Ethiopia: an extended cost-effectiveness analysis
Source: Springer Nature journal article supplement (doi:10.1186/s12936-020-3103-5), 2020-01-23
Supplement: MOESM1 [file 17611244]

## **Additional appendix**

Health gains and financial risk protection afforded by public financing of selected malaria interventions in Ethiopia: an extended cost-effectiveness analysis

By

Lelisa Fekadu Assebe, Xiaoxiao Jiang Kwete, Dan Wang, Lingrui Liu, Ole Frithjof Norheim, Abdulrahman Jbaily, Stéphane Verguet, Kjell Arne Johansson, Mieraf Tadesse Tolla

### **1. Introduction**

This appendix describes the assumptions underlying the methodology used, and presents supplementary tables, figures, and sensitivity analyses used for the extended cost-effectiveness analysis (ECEA) of universal public finance (UPF) of selected malaria preventive and curative interventions. The methodology for the four malaria interventions is described under section 2 and builds on a previous ECEA of malaria vaccine in Zambia [1].

#### **1.1. Description of model inputs and assumptions for all the interventions**

The population at risk of malaria (about 60% of the total Ethiopian population) is the target population for long-lasting insecticide-treated bednets (LLIN) and indoor residual spraying (IRS); for artemisinin combination therapy (ACT), the target population is the estimated number of annual malaria cases of 2016. For malaria vaccine, the target population is the Ethiopian 2016 birth cohort (i.e. calculated as a product of crude birth rate by the size of the at-risk population) in at-risk areas followed over five years to capture the potential full impact of the vaccine. Each target population was evenly distributed across income quintiles for LLIN, IRS and ACT interventions. For the vaccine, quintile-specific total fertility rates were applied in order to differentiate the number of susceptible infants across income quintiles [2].

For each intervention, to distribute the prevalence of malaria for the at-risk population across income quintiles, we used the average malaria prevalence across socioeconomic groups with two diagnostic methods (microscopy and rapid diagnostic test) from the 2015 Malaria Indicator

Survey and the proportion of clinical malaria cases (i.e. 0.5%) from Ethiopia’s Federal Ministry of Health (FMOH) malaria review report [3,4].

In order to calculate malaria prevalence by at-risk population per income quintile, we first estimated the relative risk of malaria prevalence by income quintile, and then multiplied it with the prevalence of malaria for the at-risk population. The distribution of malaria cases into outpatient and inpatient categories followed the share of malaria-related hospital admissions and was further disaggregated by income quintile with the distribution of malaria prevalence across income quintiles [5,6].

Case fatality ratios (CFR) for both outpatient and inpatient cases were extracted from the World Health Organization (WHO) 2015 and 2016 malaria reports, which were assumed to be similar across quintiles [7,8]. Then, for all the interventions (except vaccine), we distributed the baseline malaria-related deaths by income quintile through the product of outpatient and inpatient CFR by the number of outpatient and inpatient malaria cases, respectively.

Regarding malaria vaccine, at baseline, among the total malaria deaths, 48% of deaths would occur among under-five children [9]. The total number of malaria deaths was multiplied by this proportion in order to obtain the number of malaria deaths among under-five children [8,9]. Furthermore, malaria deaths were disaggregated by age group, as vaccine efficacy would wane with time since vaccination [8,9]. We used proxy measures (prevalence, treatment coverage, efficacy and child mortality) to distribute the malaria-related deaths by income quintile [10]. We estimated a relative risk ratio of dying from malaria between two income groups  $j$  and  $k$  as:

$$\frac{R_j}{R_k} \sim \frac{5q0_j \times (1 - aCOV_j Eff)}{5q0_k \times (1 - aCOV_k Eff)}, \quad (1)$$

where  $5q0_j$  is under-five mortality in income quintile  $j$ ,  $aCOV_j$  is malaria treatment coverage in income group  $j$  as provided by EDHS 2016 [2], and  $Eff$  is treatment effectiveness (assumed constant across quintiles for simplicity) [11]. The risk index in equation (1) (i.e.  $R_k$ ) is estimated as an average of three proxy measures: probability of being infected with malaria, malaria treatment seeking and a proxy for the relative probability of dying from childhood illness. This approach enables us to distribute the baseline child deaths due to malaria in each quintile. In addition, a Weibull decay function was used to take into account the waning of the vaccine over

the five-year time horizon:  $E(t) = e_0 \exp\left(-\ln(2) \cdot \frac{(t-t_0)K}{L}\right)$ , where  $E_0$  is initial efficacy against infection (91.1% following third dose),  $L$  is half-life protection,  $K$  is the decay shape, and  $(t - t_0)$  is the time since vaccination [12]. The birth cohort would receive three vaccine doses over 6, 7.5 and 9 months, where vaccine would offer protection starting at age 9 months. UPF would yield a 10% incremental coverage across quintiles for all four interventions.

## 2. ECEA of malaria interventions

For the three preventive (LLIN, IRS and vaccine) and one curative (ACT) malaria intervention, we divide the population into five income groups  $j$ , and we denote  $y_j$  the average individual consumption expenditures per income quintile.  $p_{in,j}$  denotes the proportion of inpatient malaria cases, and  $p_{out,j}$  denotes the proportion of outpatient malaria cases in income quintile  $j$ ; and health care utilization is denoted  $u_j$ .  $OOP_{in,j}$  are the OOP costs of inpatient visit for malaria, and  $OOP_{out,j}$  are the OOP costs of outpatient visit for malaria among income group  $j$ ;  $OOP_{total,j}$  is the total OOP costs in income quintile  $j$ .  $C_{in,gov,j}$  and  $C_{out,gov,j}$  are the government costs for inpatient and outpatient visit for malaria disease treatment in income group  $j$ . The intervention has an effectiveness  $Eff$ ; the incremental coverage achieved by the program is  $Cov_j$ .

### 2.1. Estimation of health benefits (i.e. deaths averted)

The number of deaths averted by the intervention in income group  $j$  was expressed with a simple static model:

$$D_{av,j} = (Eff * Cov_j * D_j) \quad , \quad (2)$$

where  $D_j$  is the annual number of malaria-related deaths (among under-fives or among all age groups) in income quintile  $j$  before the program, and  $Cov_j$  is incremental coverage.

### 2.2. Consequences for household expenditures

We estimated the private expenditures averted in each income quintile  $j$  for both preventive interventions (vaccine, LLIN, IRS) and curative interventions (ACT) potentially rolled out in Ethiopia. For preventive interventions, the private expenditures averted by public finance in each income quintile  $j$  would be computed as:

$$PE_{av,j} = Eff * Cov_j * u_j * [p_{in,j} * OOP_{in,j} + p_{out,j} * OOP_{out,j}] * n_j \quad , \quad (3)$$

where  $n_j$  is the annual number of malaria cases (among under-fives or among all age groups) in income quintile  $j$  before the program.

For curative interventions (i.e. ACT), the private expenditures averted by publicly finance in each income quintile  $j$  would be computed as:

$$PE_{av,j} = u_j * [p_{in,j} * OOP_{in,j} + p_{out,j} * OOP_{out,j}] * n_j \quad , \quad (4)$$

where  $n_j$  is the annual number of malaria cases (among under-fives or among all age groups) in income quintile  $j$  before the program, as before-the-program out-of-pocket (OOP) costs are removed by public finance.

### 2.3. Estimation of financial risk protection benefits

A case of catastrophic health expenditure (CHE) before intervention ( $CHE_0$ ) is counted when OOP spending for malaria care ( $OOP_{in,j}$  or  $OOP_{out,j}$  above) is higher than a specified threshold (Th =10%) defined in comparison with consumption expenditures per quintile (i.e.  $y_j$ ). Then,  $CHE_0$  among those who utilized care occur when  $OOP_{in,j}$  or  $OOP_{out,j} > Th * y_j$ .

For preventive interventions (vaccine, IRS, LLIN), the introduction of public finance would avert the following number of CHE cases per income quintile  $j$ :

$$CHE_{av,j} = Cov_j * Eff * CHE_0 \quad . \quad (5)$$

For curative interventions (ACT), the introduction of public finance would avert the following number of CHE cases per income quintile:  $Cov_j * CHE_0$  .

Cases of CHE were estimated using either a threshold of annual income or a capacity to pay approach (Table S1). For capacity to pay, we extracted the proportion of food expenditure ( $FE_j$ ) per income quintile  $j$ . Then, we calculated the absolute value of subsistence expenditure ( $SE_j$ ) in quintile  $j$  as  $SE_j = (1 - FE_j) * y_j$ . Capacity to pay was calculated as  $y_j - SE_j$  [13,14].

### 2.4. Quantification of the total costs of the program

From the government perspective, the total costs incurred for the vaccine program are, per income quintile:

$$TC_{Vac,j} = Cov_j * C_{vac} * Pop_j \quad , \quad (6)$$

where  $C_{vac}$  stands for both the costs of the vaccine (3 doses) and program implementation,  $Cov_j$  is vaccine coverage per quintile, and  $Pop_j$  is the target population per quintile. The healthcare costs of malaria treatment averted by vaccine for the government (per quintile  $j$ ) are:

$$TC_{HC,j} = Eff * Cov_j * u_j * [(p_{in,j} * C_{in,gov,j} + p_{out,j} * C_{out,gov,j})] * n_j , \quad (7)$$

where  $n_j$  is the annual number of malaria cases (among under-fives or among all age groups) in income group  $j$  before program. Hence, from the government perspective, the net incremental costs incurred are:

$$TC = TC_{Vac,j} - TC_{HC,prev,j} . \quad (8)$$

From the government perspective, the total incremental costs incurred for LLIN/IRS program are, per income quintile:

$$TC_{prev,j} = Cov_j * c_{gov} * Pop_j , \quad (9)$$

where  $c_{gov}$  is the unit costs of LLIN/IRS intervention,  $Pop_j$  is the target population per quintile, and  $Cov_j$  is incremental coverage (10%). The total LLIN cost is adjusted by one half, corresponding to one net per two people within a household.

The healthcare costs of malaria treatment averted by LLIN/IRS intervention for the government (per quintile  $j$ ) are:

$$TC_{HC,prev,j} = Eff * Cov_j * u_j * [(p_{in,j} * C_{in,gov,j} + p_{out,j} * C_{out,gov,j})] * n_j , \quad (10)$$

where  $n_j$  is the annual number of malaria cases (among under-fives or among all age groups) in income quintile  $j$  before program, and  $Cov_j$  is incremental coverage (10%). Hence, from the government perspective, the net incremental costs incurred are:

$$TC = TC_{prev,j} - TC_{HC,prev,j} . \quad (10)$$

From the government perspective, for ACT, the incremental government expenditure per quintile are given by:

$$TC_{cure,j} = Cov_j * n_j * (p_{in,j} * C_{in,gov,j} + p_{out,j} * C_{out,gov,j}) + (p_{in,j} * OOP_{in,j} + p_{out,j} * OOP_{out,j}) * u_j * n_j , \quad (11)$$

where  $n_j$  is the annual number of malaria cases (among under-fives or among all age groups) in income quintile  $j$  before program;  $u_j$  is healthcare utilization before program, and  $Cov_j$  is the incremental coverage (10%).

### 3. Additional tables and figures

**Table S1.** Cases of catastrophic health expenditure averted, for public finance of malaria interventions after a 10% increase in coverage, in Ethiopia.

| <b>Interventions</b>                     | <b>Cases of catastrophic health expenditures averted</b> | <b>Cases of catastrophic health expenditures averted (40% capacity to pay)</b> |
|------------------------------------------|----------------------------------------------------------|--------------------------------------------------------------------------------|
| Artemisinin-based combination            | 440                                                      | 182                                                                            |
| Long-lasting insecticide-treated bednets | 220                                                      | 91                                                                             |
| Indoor residual spray                    | 125                                                      | 52                                                                             |
| Malaria vaccine                          | 18                                                       | 9                                                                              |

Annual parasite incidence (API) corresponds to the total number of positive confirmed cases per 1000 population per year [15]. The API level for a specific geographic area is used to classify the districts into control (i.e.  $API \geq 10$ ), optimization (i.e.  $5 < API < 10$ ), pre-elimination and elimination phases (i.e.  $0 < API < 5$ ). As shown in Table S2, the health impact of all malaria interventions in the control phase would be substantial, however in other phases selected interventions would yield more benefit.

**Table S2:** Extended cost-effectiveness analysis results for each intervention per malaria transmission intensity: deaths averted, out-of-pocket (OOP) expenditures averted, and cases of catastrophic health expenditures (CHE) averted.

| <b>Intervention</b> | <b>Outcome</b>           | <b>0 &lt; API &lt; 5 (Pre-elimination/ Elimination)</b> | <b>5 <math>\geq</math> API &lt; 10 (Optimization phase)</b> | <b>API <math>\geq</math> 10 (Control phase)</b> |
|---------------------|--------------------------|---------------------------------------------------------|-------------------------------------------------------------|-------------------------------------------------|
| LLINs               | Deaths averted           | 4                                                       | 14                                                          | 102                                             |
|                     | OOP expenditures averted | 3,696                                                   | 16,262                                                      | 106,213                                         |
|                     | Cases of CHE averted     | 7                                                       | 20                                                          | 179                                             |
| IRS                 | Deaths averted           | 2                                                       | 8                                                           | 58                                              |
|                     | OOP expenditures averted | 2,107                                                   | 9,269                                                       | 60,541                                          |
|                     | Cases of CHE averted     | 4                                                       | 11                                                          | 102                                             |
| Malaria vaccine     | Deaths averted           | 0                                                       | 1                                                           | 10                                              |
|                     | OOP expenditures averted | 300                                                     | 1,321                                                       | 8,627                                           |
|                     | Cases of CHE averted     | 2                                                       | 10                                                          | 88                                              |
| ACT                 | Deaths averted           | 8                                                       | 27                                                          | 194                                             |
|                     | OOP expenditures averted | 73,913                                                  | 325,232                                                     | 2,124,255                                       |
|                     | Cases of CHE averted     | 13                                                      | 38                                                          | 340                                             |

**Figure S1.** Distribution of deaths averted and financial risk protection afforded per US\$1 million spent in each income quintile for malaria interventions (Q1 is poorest and Q5 is richest) in Ethiopia.

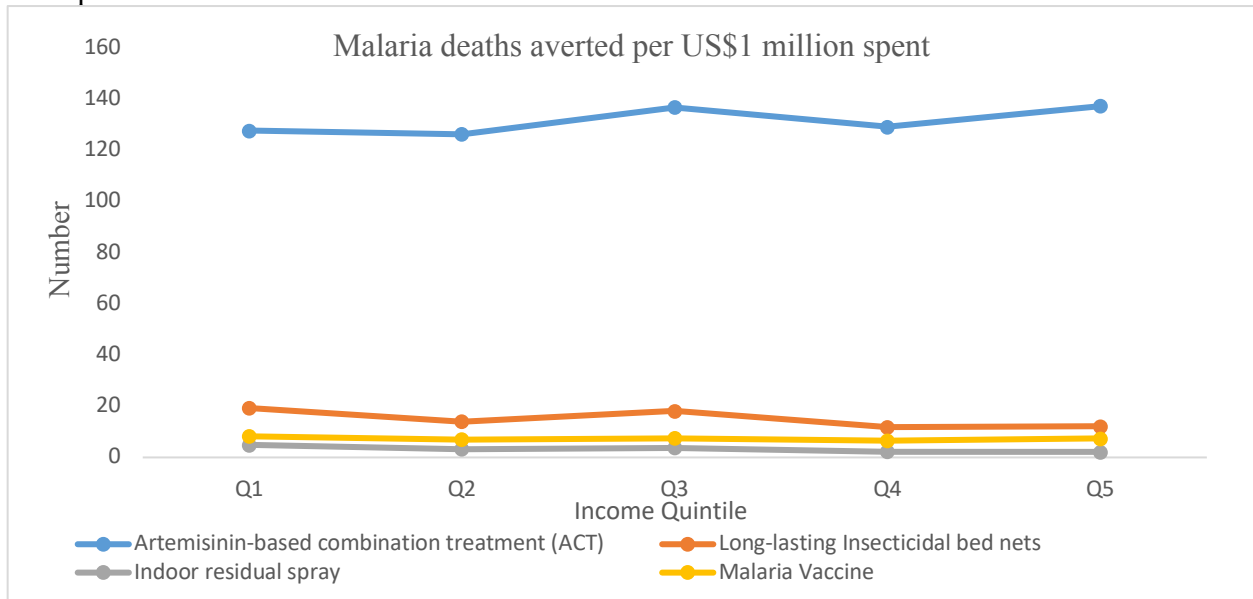

**Figure S2.** Distribution of financial risk protection afforded per US\$1 million government expenditures for each of malaria intervention per income quintile (Q1 is poorest and Q5 is richest) in Ethiopia.

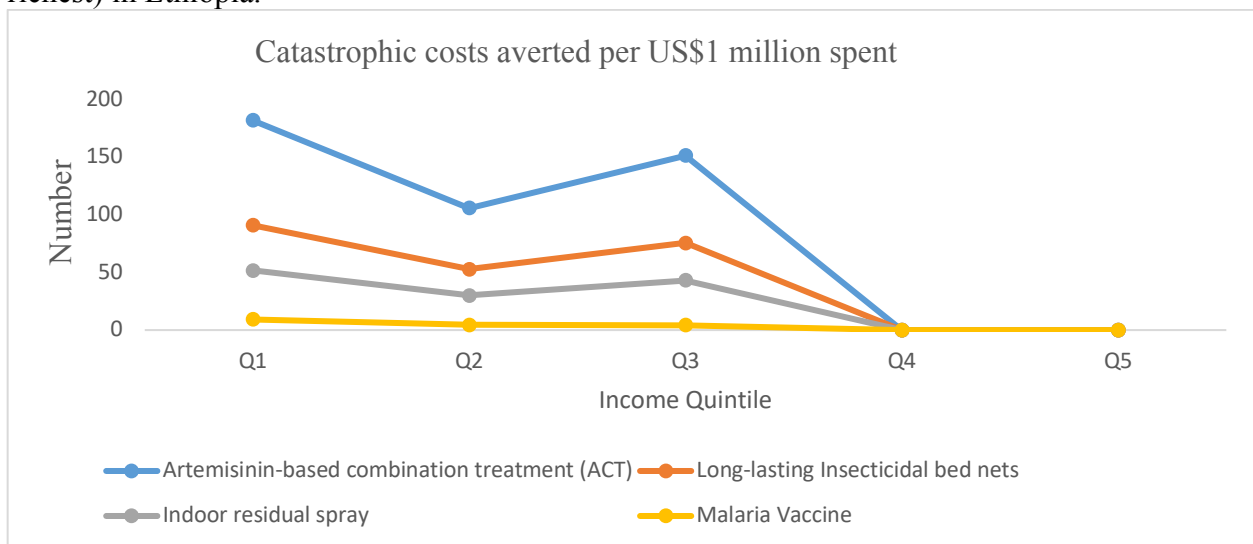

**Figure S3.** Private expenditure averted (in USD) and malaria deaths averted, per \$1 million net government expenditures, per income quintile, by malaria preventive intervention in Ethiopia.

Q1 = Poorest; Q2 = Poorer; Q3 = Middle; Q4 = Richer; Q5 = Richest.

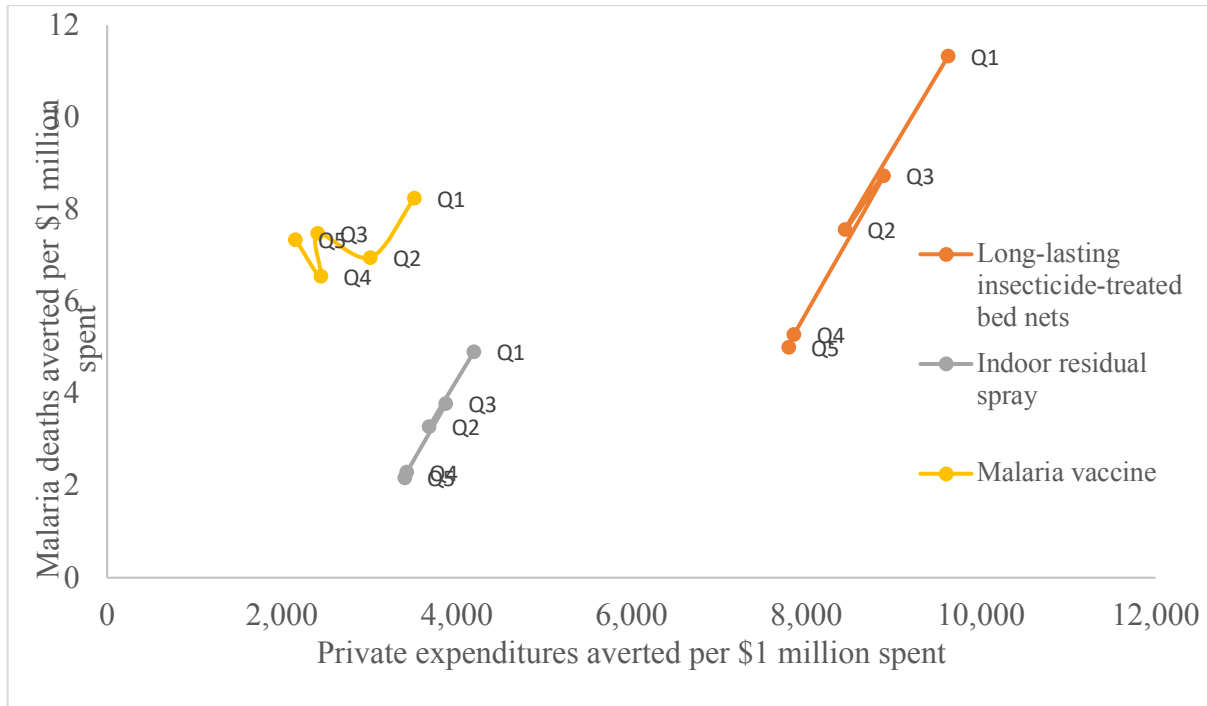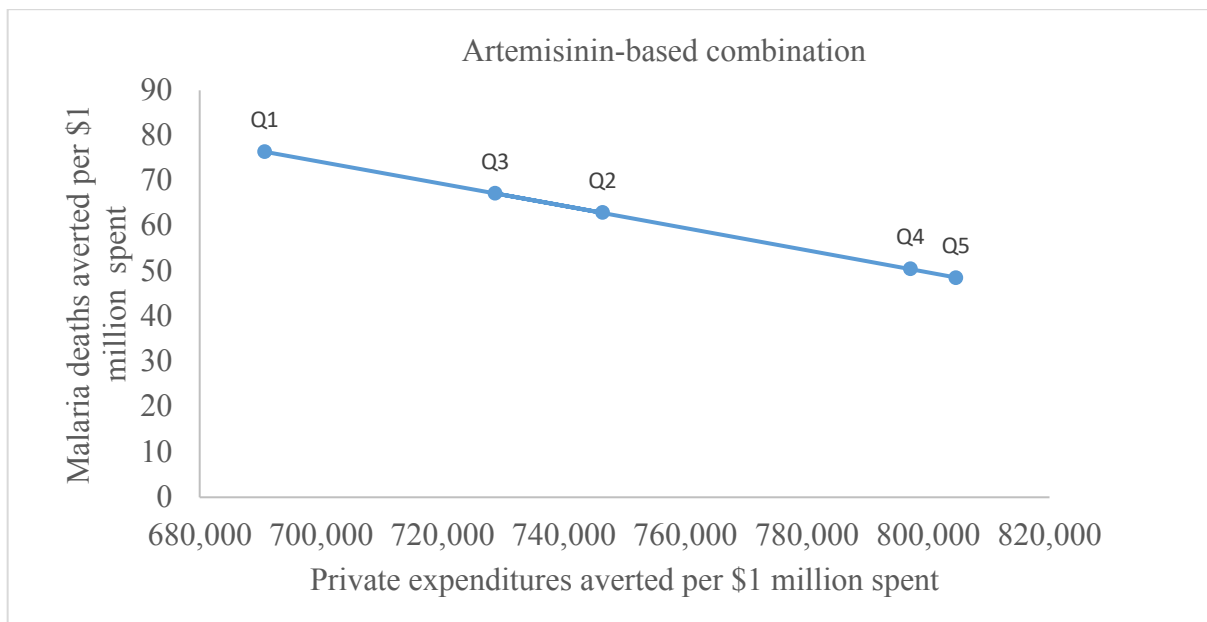



#### 4. Sensitivity analyses

**Table S3:** Sensitivity analysis of deaths averted and cases of catastrophic health expenditures (CHE) when IRS model input parameters were varied across income quintiles (Q1 = poorest; Q5 = richest), (low to high shows when model input parameters are decreased/increased, respectively).

| Sensitivity analysis IRS                   | Q1   |      | Q2   |      | Q3   |      | Q4   |      | Q5   |      |
|--------------------------------------------|------|------|------|------|------|------|------|------|------|------|
|                                            | Low  | High | Low  | High | Low  | High | Low  | High | Low  | High |
| <b>Prevalence of malaria</b>               |      |      |      |      |      |      |      |      |      |      |
| Deaths averted                             | 26   | 39   | 17   | 26   | 20   | 30   | 12   | 18   | 12   | 17   |
| Private expenditures averted (\$1,000s)    | 22   | 33   | 19   | 29   | 21   | 31   | 18   | 27   | 18   | 27   |
| CHE cases averted                          | 42   | 62   | 24   | 36   | 35   | 52   | 0    | 0    | 0    | 0    |
| <b>Malaria case fatality ratio</b>         |      |      |      |      |      |      |      |      |      |      |
| Death averted                              | 26   | 38   | 17   | 26   | 20   | 29   | 12   | 18   | 11   | 17   |
| Private expenditures averted (\$1,000s)    | 28   | 28   | 24   | 24   | 25   | 25   | 22   | 22   | 22   | 22   |
| CHE cases averted                          | 52   | 52   | 30   | 30   | 43   | 43   | 0    | 0    | 0    | 0    |
| <b>Health care use</b>                     |      |      |      |      |      |      |      |      |      |      |
| Death averted                              | 32   | 32   | 21   | 21   | 25   | 25   | 15   | 15   | 14   | 14   |
| Private expenditures averted (\$1,000s)    | 22   | 33   | 19   | 29   | 20   | 31   | 18   | 27   | 18   | 27   |
| CHE cases averted                          | 42   | 63   | 24   | 36   | 35   | 52   | 0    | 0    | 0    | 0    |
| <b>Probability of inpatient visit</b>      |      |      |      |      |      |      |      |      |      |      |
| Death averted                              | 32   | 32   | 21   | 22   | 25   | 25   | 15   | 15   | 14   | 14   |
| Private expenditures averted (\$1,000s)    | 33   | 34   | 28   | 29   | 30   | 31   | 27   | 27   | 27   | 27   |
| CHE cases averted                          | 50   | 75   | 29   | 43   | 41   | 62   | 0    | 0    | 0    | 0    |
| <b>Efficacy</b>                            |      |      |      |      |      |      |      |      |      |      |
| Death averted                              | 26   | 38   | 17   | 26   | 20   | 30   | 12   | 18   | 11   | 17   |
| Private expenditures averted (\$1,000s)    | 22   | 33   | 19   | 29   | 20   | 31   | 18   | 27   | 18   | 27   |
| CHE cases averted                          | 42   | 62   | 24   | 36   | 35   | 52   | 0    | 0    | 0    | 0    |
| <b>Cost inputs /IRS</b>                    |      |      |      |      |      |      |      |      |      |      |
| Government costs for the policy (\$1,000s) | 5216 | 7838 | 5220 | 7842 | 5214 | 7836 | 5221 | 7843 | 5218 | 7840 |
| <b>OOP outpatient /IRS</b>                 |      |      |      |      |      |      |      |      |      |      |
| Death averted                              | 32   | 32   | 21   | 21   | 25   | 25   | 15   | 15   | 14   | 14   |
| Private expenditures averted (\$1,000s)    | 23   | 32   | 20   | 29   | 21   | 30   | 19   | 27   | 18   | 26   |
| CHE cases averted                          | 52   | 52   | 30   | 30   | 43   | 43   | 0    | 0    | 0    | 0    |

**Table S4:** Sensitivity analysis of deaths averted and cases of catastrophic health expenditures (CHE) averted when malaria vaccine model input parameters were varied across income quintiles (Q1 = poorest; Q5 = richest), (low to high shows when the model input parameters are decreased or increased, respectively).

| Sensitivity analysis vaccine          | Q1           |              | Q2         |              | Q3         |              | Q4         |              | Q5         |            |
|---------------------------------------|--------------|--------------|------------|--------------|------------|--------------|------------|--------------|------------|------------|
|                                       | Low          | High         | Low        | High         | Low        | High         | Low        | High         | Low        | High       |
| <b>Prevalence of malaria</b>          |              |              |            |              |            |              |            |              |            |            |
| Deaths averted                        | 9            | 11           | 7          | 8            | 6          | 8            | 5          | 6            | 3          | 4          |
| Private expenditures averted          | 3 900        | 5 850        | 2 930      | 4 390        | 2 040      | 3 070        | 1 820      | 2 730        | 972        | 1 460      |
| CHE cases averted                     | 7            | 11           | 4          | 5            | 3          | 5            | 0          | 0            | 0          | 0          |
| <b>Malaria case fatality ratio</b>    |              |              |            |              |            |              |            |              |            |            |
| Deaths averted                        | 9            | 11           | 7          | 8            | 6          | 8            | 5          | 6            | 3          | 4          |
| Private expenditures averted          | 4 880        | 4 880        | 3 660      | 3 660        | 2 560      | 2 560        | 2 280      | 2 280        | 1 210      | 1 210      |
| CHE cases averted                     | 9            | 9            | 5          | 5            | 4          | 4            | 0          | 0            | 0          | 0          |
| <b>Health care use</b>                |              |              |            |              |            |              |            |              |            |            |
| Deaths averted                        | 11           | 11           | 8          | 8            | 8          | 8            | 6          | 6            | 4          | 4          |
| Private expenditures averted          | 3 940        | 5 900        | 2 890      | 4 330        | 2 050      | 3 070        | 1 810      | 2 710        | 981        | 1 470      |
| CHE cases averted                     | 5            | 14           | 2          | 7            | 2          | 7            | 0          | 0            | 0          | 0          |
| <b>Probability of inpatient visit</b> |              |              |            |              |            |              |            |              |            |            |
| Deaths averted                        | 11           | 11           | 8          | 8            | 8          | 8            | 6          | 6            | 4          | 4          |
| Private expenditures averted          | 4 770        | 4 990        | 3 610      | 3 710        | 2 500      | 2 610        | 2 250      | 2 300        | 1 200      | 1 230      |
| CHE cases averted                     | 7            | 11           | 4          | 5            | 3          | 5            | 0          | 0            | 0          | 0          |
| <b>Efficacy</b>                       |              |              |            |              |            |              |            |              |            |            |
| Death averted                         | 9            | 14           | 7          | 10           | 6          | 10           | 5          | 7            | 3          | 5          |
| Private expenditures averted          | 3 900        | 5 850        | 2 930      | 4 390        | 2 050      | 3 070        | 1 820      | 2 730        | 970        | 1 460      |
| CHE cases averted                     | 7            | 11           | 4          | 5            | 3          | 5            | 0          | 0            | 0          | 0          |
| <b>Cost inputs /vaccine</b>           |              |              |            |              |            |              |            |              |            |            |
| Government costs for the policy       | 1 108<br>670 | 1 665<br>610 | 970<br>860 | 1 458<br>170 | 849<br>670 | 1 276<br>070 | 745<br>928 | 1 120<br>118 | 451<br>020 | 677<br>275 |
| <b>OOP outpatient /vaccine</b>        |              |              |            |              |            |              |            |              |            |            |
| Deaths averted                        | 11           | 11           | 8          | 8            | 8          | 8            | 6          | 6            | 4          | 4          |
| Private expenditures averted          | 4 020        | 5 730        | 2 990      | 4 330        | 2 100      | 3 010        | 1 850      | 2 710        | 990        | 1 440      |
| CHE cases averted                     | 9            | 9            | 5          | 5            | 4          | 4            | 0          | 0            | 0          | 0          |

**Table S5:** Sensitivity analysis of death averted and cases of catastrophic health expenditures (CHE) averted when ACT model input parameters were varied across income quintiles (Q1 = poorest; Q5 = richest), (low to high shows when the model input parameters are decreased or increased, respectively).

| Sensitivity analysis ACT                                               | Q1   |      | Q2   |       | Q3   |       | Q4   |      | Q5   |      |
|------------------------------------------------------------------------|------|------|------|-------|------|-------|------|------|------|------|
|                                                                        | Low  | High | Low  | High  | Low  | High  | Low  | High | Low  | High |
| <b>Prevalence of malaria</b>                                           |      |      |      |       |      |       |      |      |      |      |
| Deaths averted                                                         | 86   | 128  | 57   | 86    | 67   | 100   | 40   | 60   | 38   | 58   |
| Private expenditures averted (\$1,000s)                                | 774  | 1161 | 678  | 10167 | 722  | 10823 | 6367 | 955  | 6367 | 954  |
| Cases of CHE averted                                                   | 146  | 219  | 85   | 127   | 123  | 184   | 0    | 0    | 0    | 0    |
| <b>Malaria case fatality ratio</b>                                     |      |      |      |       |      |       |      |      |      |      |
| Deaths averted                                                         | 86   | 127  | 58   | 85    | 66   | 98    | 40   | 60   | 38   | 57   |
| Private expenditures averted (\$1,000s)                                | 966  | 966  | 847  | 847   | 892  | 892   | 789  | 789  | 783  | 783  |
| Cases CHE averted                                                      | 182  | 182  | 106  | 106   | 152  | 152   | 0    | 0    | 0    | 0    |
| <b>Health care use</b>                                                 |      |      |      |       |      |       |      |      |      |      |
| Deaths averted                                                         | 107  | 107  | 71   | 71    | 82   | 82    | 50   | 50   | 47   | 47   |
| Private expenditures averted (\$1,000s)                                | 779  | 1169 | 669  | 1004  | 714  | 1070  | 627  | 940  | 632  | 949  |
| Cases CHE averted                                                      | 147  | 220  | 84   | 125   | 121  | 182   | 0    | 0    | 0    | 0    |
| <b>Probability of inpatient visit</b>                                  |      |      |      |       |      |       |      |      |      |      |
| Deaths averted                                                         | 106  | 108  | 71   | 72    | 82   | 83    | 50   | 50   | 47   | 47   |
| Private expenditures averted (\$1,000s)                                | 945  | 988  | 835  | 860   | 874  | 910   | 78   | 798  | 773  | 792  |
| Cases of CHE averted                                                   | 146  | 219  | 85   | 127   | 121  | 182   | 0    | 0    | 0    | 0    |
| <b>Efficacy</b>                                                        |      |      |      |       |      |       |      |      |      |      |
| Deaths averted                                                         | 86   | 113  | 57   | 75    | 66   | 87    | 40   | 53   | 38   | 50   |
| Private expenditures averted (\$1,000s)                                | 966  | 966  | 847  | 847   | 892  | 892   | 789  | 789  | 783  | 783  |
| Cases of CHE averted                                                   | 182  | 182  | 106  | 106   | 152  | 152   | 0    | 0    | 0    | 0    |
| <b>Cost inputs /ACT/</b>                                               |      |      |      |       |      |       |      |      |      |      |
| Government costs for the treatment (outpatient cost varied) (\$1,000s) | 1316 | 1479 | 1079 | 1189  | 1160 | 1286  | 950  | 1028 | 935  | 1009 |
| Government costs for the treatment (inpatient cost varied) (\$1,000s)  | 1394 | 144  | 1133 | 1138  | 1221 | 1227  | 989  | 991  | 92   | 974  |
| <b>OOP outpatient /ACT/</b>                                            |      |      |      |       |      |       |      |      |      |      |
| Deaths averted                                                         | 107  | 107  | 71   | 71    | 82   | 82    | 50   | 50   | 47   | 47   |
| Private expenditures averted (\$1,000s)                                | 797  | 1135 | 692  | 1003  | 734  | 1050  | 641  | 937  | 636  | 929  |
| Cases of CHE averted                                                   | 182  | 182  | 106  | 106   | 152  | 152   | 0    | 0    | 0    | 0    |

**Table S6:** Sensitivity analysis of deaths averted when all deaths occurring in the general population is assumed to occur in population at risk (i.e. high case scenario, 5,000 and base case scenario, 3,767) at baseline.

| <b>Sensitivity analysis</b> | <b>Intervention</b> | <b>Scenario</b> | <b>Average</b> | <b>Q1</b> | <b>Q2</b> | <b>Q3</b> | <b>Q4</b> | <b>Q5</b> |
|-----------------------------|---------------------|-----------------|----------------|-----------|-----------|-----------|-----------|-----------|
|                             | ACT                 | Base case       | 358            | 107       | 71        | 82        | 50        | 47        |
|                             |                     | High case       | 475            | 141       | 95        | 109       | 67        | 63        |
|                             | LLIN                | Base case       | 188            | 56        | 38        | 43        | 26        | 25        |
|                             |                     | High case       | 250            | 74        | 50        | 57        | 35        | 33        |
|                             | IRS                 | Base case       | 107            | 32        | 21        | 25        | 15        | 14        |
|                             |                     | High case       | 143            | 42        | 28        | 33        | 20        | 19        |
|                             | Vaccine             | Base case       | 38             | 11        | 8         | 8         | 6         | 4         |
|                             |                     | High case       | 51             | 15        | 11        | 11        | 8         | 6         |

As shown in the above table if all malaria related deaths were attributed to population at risk, the death averted proportion would increase by approximately 42% for all interventions.

## References

1. Liu L, Portnoy A, True Z, Fink G, Verguet S. The health and financial benefits for households from averting malaria with RTS, S/AS01 vaccine in Zambia: an extended cost-effectiveness analysis. *Disease Control Priorities in Developing Countries*, 3rd Edition, Working Paper No. 26. Seattle: University of Washington, 2018.
2. Central Statistical Agency, Federal Democratic Republic of Ethiopia. Ethiopia Demographic and Health Survey. Addis Ababa, Ethiopia; Rockville, Maryland, USA: ICF International, central Statistical Agency; 2016.
3. Ethiopian Public Health Institute. The 2016 Ethiopia National Malaria Indicator Survey (EMIS). Addis Ababa, Ethiopia: Ethiopian Public Health Institute; 2016.
4. Ethiopia Federal Ministry of Health. Ethiopian External Malaria Program midterm review. Addis Ababa, Ethiopia: Federal Ministry of Health; 2017.
5. Jima D, Wondabeku M, Alemu A, Teferra A, Awel N, Deressa W, et al. Analysis of malaria surveillance data in Ethiopia: what can be learned from the Integrated Disease Surveillance and Response System? *Malaria Journal* 2012; 11(1):330.
6. President's Malaria Initiative (PMI). 2017 Ethiopia Malaria Operational Plan. 2017.
7. World Health Organization. World malaria report 2015. Geneva: World Health Organization; 2015.
8. World Health Organization. World malaria report 2017. Geneva: World Health Organization; 2017.
9. Institute for Health Metrics and Evaluation. Global Burden of Disease (GBD) 2016 data. Retrieved from: <https://vizhub.healthdata.org/gbd-compare/> (accessed May 10, 2018).
10. Rheingans RD, Atherly D, Anderson J. Distributional impact of rotavirus vaccination in 25 Gavi countries: estimating disparities in benefits and cost-effectiveness. *Vaccine* 2012; 30:A15-A23.
11. Penny MA, Ross PP, Smith TA. The time-course of protection of the RTS,S vaccine against malaria infections and clinical disease. *Malaria Journal* 2015; 14:437.
12. Daivadanam M, Thankappan KR, Sarma PS, Harikrishnan S. Catastrophic health expenditure and coping strategies associated with acute coronary syndrome in Kerala, India. *Indian J Med Res* 2012; 136(4):585-92.
13. National Planning commission Ethiopia. Ethiopia's Progress Towards Eradicating Poverty: An Interim Report on 2015/16 Poverty Analysis Study. September 2017.
14. Federal Ministry of Health. National Malaria Strategic Plan 2017–2020. April 2017.
